# Supplementary material for: Human Leucocyte Antigen (HLA) class I expression is an EBV-independent major determinator of microenvironment composition in classic Hodgkin Lymphoma and associated with a cytotoxic immune response
Source: Research Square preprint supplement (doi:10.21203/rs.3.rs-3109943/v1), 2023-07-05
Supplement: Supplementary file 1 [file 5f113309d2f990076f6ee5e0.xlsx]

## Sheet: Tabelle1
NIVAHL	HLA-I+	HLA-I-	HLA-I-n.a	p
	(11/105, 10%)	(86/105, 82%)	(8/105, 8%)
HLA-II+	7/11 (64%)	46/86 (54%)	0/8 (0%)	p=0.7494*
HLA-II-	4/11 (36%)	39/86 (45%)	2/8 (25%)
HLA-II n.a.	0/11 (0%)	1/86 (1%)	6/8 (75%)	n.a.
Nodular Sclerosis	3/11 (27%)	66/86 (77%)	1/8 (13%)	p=0.002**
Mixed Cellularity	3/11 (27%)	12/86 (14%)	0/8 (0%)
others	2/11(18%)	1/86 (15%)	0/8 (0%)
n.a.	3/11 (27%)	7/86 (8%)	7/8 (88%)	n.a.
EBV+	5/11 (45%)	7/86 (8%)	2/8 (25%)	p=0.0058*
Table 1: EBV= Epstein Barr Virus, n.a.= not analyzed, *Fisher's exact test, **Chi square test, statistical tests calculated for HLA-I+ versus HLA-I-
